# Supplementary material
Source: PubMed Central journal article supplement (PMC5286372)
Supplement: EMBJ-36-361-s001.pdf [file EMBJ-36-361-s001.pdf]

# **Topoisomerase I-mediated cleavage at unrepaired ribonucleotides generates DNA double-strand breaks**

## **Appendix**

Shar-yin N. Huang <sup>1,\*</sup>, Jessica S. Williams <sup>2,\*</sup>, Mercedes E. Arana <sup>2</sup>, Thomas A. Kunkel <sup>2</sup>  
and Yves Pommier <sup>1,#</sup>

<sup>1</sup> Developmental Therapeutics Branch and Laboratory of Molecular Pharmacology, Center for Cancer Research, National Cancer Institute, NIH, Bethesda, MD 20892.

<sup>2</sup> Genome Integrity and Structural Biology Laboratory, National Institute of Environmental Health Sciences, NIH, Research Triangle Park, NC 27709.

\* These authors contributed equally to this work.

# Corresponding author: Email: [pommier@nih.gov](mailto:pommier@nih.gov)

### **Table of Contents**

Appendix Table S1

Appendix Table S2

Appendix Table S3

Appendix Figure S1

Appendix Figure S2

Appendix Figure S3

Appendix Figure S4

Appendix References

**Appendix Table S1** - Specific mutation rates ( $\times 10^{-8}$ ) for individual mutation classes of *URA3* reporter gene in orientation 2

| Strain                                                    | Overall Rate | $\Delta$ 2–5 bp | BPS | $\pm 1$ frameshifts |
|-----------------------------------------------------------|--------------|-----------------|-----|---------------------|
| <i>WT</i>                                                 | 2.1          | 0.018           | 1.2 | 0.18                |
| <i>rnh201<math>\Delta</math></i>                          | 5.1          | 1.8             | 1.7 | 0.26                |
| <i>rnh201<math>\Delta</math> rad52<math>\Delta</math></i> | 45           | 0.97            | 30  | 8.1                 |

BPS; base pair substitutions. Specific mutation rates were calculated as the proportion of each type of event among the total mutants sequenced, multiplied by the mutation rate for each strain (using the data shown in Fig EV2). Sequencing data is from (Nick McElhinny et al., 2010) for the *WT* strain and from (Clark et al., 2011) for the *rnh201 $\Delta$*  strain. Consistent with previous results (Clark et al., 2011, Kim et al., 2011), loss of *RNH201* caused a small (2-3 fold) increase in overall mutation rate. Deletion of *RAD52* caused an approximately 30-fold increase in the spontaneous mutation rate for both reporters, in agreement with previous studies (Kunz et al., 1989, Kunz et al., 1998). In these studies, the elevated mutation rate in *rad52 $\Delta$*  cells has been attributed to translesion synthesis (TLS) by Pol  $\zeta$  (Rev3 in yeast). Inactivation of *RAD52* blocks the repair of spontaneous DNA lesions through the error-free HR pathway and channels them into the TLS repair pathway instead, leading to a high rate of Rev3-dependent single base substitutions (Endo et al., 2007, Huang et al., 2002, Kunz et al., 1998, Roche et al., 1995). The high overall mutation rate of a *rad52 $\Delta$*  mutant was not significantly changed following additional loss of *RNH201*, or *TOPI*, or both. This suggests that the generation and/or repair of the majority the spontaneous DNA damage that arises in *rad52 $\Delta$*  cells are independent of unrepaired ribonucleotides and/or Top1 activity.

**Appendix Table S2 - *S. cerevisiae* strains**

| <b>Name</b>                         | <b>Strain</b> | <b>Relevant Genotype</b>                                                | <b>Source</b>                 |
|-------------------------------------|---------------|-------------------------------------------------------------------------|-------------------------------|
| <i>WT</i>                           | YJW588        | <i>wt + Rad52-YFP:LEU2</i>                                              | This study                    |
| <i>rnh201Δ</i>                      | YJW590        | <i>rnh201::hphMX4 + Rad52-YFP:LEU2</i>                                  | This study                    |
| <i>top1Δ</i>                        | YJW598        | <i>top1::natMX4 + Rad52-YFP:LEU2</i>                                    | This study                    |
| <i>top1Δ</i><br><i>rnh201Δ</i>      | YJW596        | <i>top1::natMX4 rnh201::hphMX4</i><br><i>+ Rad52-YFP:LEU2</i>           | This study                    |
| <i>rnh201-RED</i>                   | YJW836        | <i>rnh201-P45D-Y219A:HphMX6</i><br><i>+ Rad52-YFP:LEU2</i>              | This study                    |
| <i>rnh201-RED</i><br><i>top1Δ</i>   | YJW839        | <i>rnh201-P45D-Y219A:HphMX6</i><br><i>top1::natMX4 + Rad52-YFP:LEU2</i> | This study                    |
| <i>rnh1Δ</i>                        |               | <i>rnh1::natMX4 + Rad52-YFP:LEU2</i>                                    | This study                    |
| <i>rnh201-RED</i><br><i>rnh1Δ</i>   | YJW827        | <i>rnh201-P45D-Y219A:HphMX6</i><br><i>rnh1::natMX4 + Rad52-YFP:LEU2</i> | This study                    |
| <i>WT</i>                           | SNM8          | <i>agp1::URA3-OR1</i>                                                   | (Nick McElhinny et al., 2010) |
| <i>WT</i>                           | SNM18         | <i>agp1::URA3-OR2</i>                                                   | (Nick McElhinny et al., 2010) |
| <i>rnh201Δ</i>                      | SNM106        | <i>rnh201::hphMX4 agp1::URA3-OR1</i>                                    | (Nick McElhinny et al., 2010) |
| <i>rnh201Δ</i>                      | SNM114        | <i>rnh201::hphMX4 agp1::URA3-OR2</i>                                    | (Nick McElhinny et al., 2010) |
| <i>pol2-M644G</i>                   | SNM70         | <i>pol2-M644G</i>                                                       | (Nick McElhinny et al., 2010) |
| <i>pol2-M644G</i><br><i>rnh201Δ</i> | SNM120        | <i>pol2-M644G rnh201::hphMX4</i>                                        | (Nick McElhinny et al., 2010) |

---

|                                                |        |                                                               |                         |
|------------------------------------------------|--------|---------------------------------------------------------------|-------------------------|
| <i>rnh201Δ top1Δ</i>                           | YJW77  | <i>rnh201::hphMX4 top1::natMX4<br/>agp1::URA3-OR2</i>         | (Kim et al., 2011)      |
| <i>top1Δ</i>                                   | YJW81  | <i>top1::natMX4 agp1::URA3-OR2</i>                            | (Williams et al., 2013) |
| <i>pol2-M644G<br/>top1Δ</i>                    | YJW85  | <i>pol2-M644G top1::natMX4</i>                                | (Williams et al., 2013) |
| <i>pol2-M644G<br/>rnh201Δ top1Δ</i>            | YJW91  | <i>pol2-M644G rnh201::hphMX4<br/>top1::natMX4</i>             | (Williams et al., 2013) |
| <i>rad51Δ</i>                                  | YJW102 | <i>rad51::natMX4</i>                                          | This study              |
| <i>pol2-M644G<br/>rnh201Δ rad51Δ</i>           | YJW106 | <i>pol2-M644G rnh201::hphMX4<br/>rad51::natMX4</i>            | This study              |
| <i>pol2-M644G<br/>rad51Δ</i>                   | YJW111 | <i>pol2-M644G rad51::natMX4</i>                               | This study              |
| <i>rnh201Δ<br/>rad51Δ</i>                      | YJW117 | <i>rnh201::hphMX4 rad51::natMX4</i>                           | This study              |
| <i>rad51Δ top1Δ</i>                            | YJW244 | <i>rad51::natMX4 top1::LEU2</i>                               | This study              |
| <i>pol2-M644G<br/>rnh201Δ rad51Δ<br/>top1Δ</i> | YJW247 | <i>pol2-M644G rnh201::hphMX4<br/>rad51::natMX4 top1::LEU2</i> | This study              |
| <i>pol2-M644G<br/>rad51Δ top1Δ</i>             | YJW249 | <i>pol2-M644G rad51::natMX4<br/>top1::LEU2</i>                | This study              |
| <i>rnh201Δ<br/>rad51Δ top1Δ</i>                | YJW252 | <i>rnh201::hphMX4 rad51::natMX4<br/>top1::LEU2</i>            | This study              |
| <i>pol2-M644G<br/>rnh201-RED</i>               | YJW409 | <i>pol2-M644G<br/>rnh201-P45D-Y219A:HphMX6</i>                | This study              |

---

---

|                                                         |        |                                                                                         |            |
|---------------------------------------------------------|--------|-----------------------------------------------------------------------------------------|------------|
| <i>top1Δ</i>                                            | YJW636 | <i>top1::LEU2 agp1::URA3-OR2</i>                                                        | This study |
| <i>rnh201Δ</i><br><i>top1Δ</i>                          | YJW638 | <i>rnh201::hphMX4 top1::LEU2</i><br><i>agp1::URA3-OR2</i>                               | This study |
| <i>pol2-M644G</i><br><i>top1Δ</i><br><i>rnh201-RED</i>  | YJW708 | <i>pol2-M644G top1::LEU2</i><br><i>rnh201-P45D-Y219A:HphMX6</i>                         | This study |
| <i>pol2-M644G</i><br><i>rad51Δ</i><br><i>rnh201-RED</i> | YJW712 | <i>pol2-M644G rad51::natMX4</i><br><i>rnh201-P45D-Y219A:HphMX6</i>                      | This study |
| <i>pol2-M644G</i><br><i>rad51Δ</i><br><i>rnh201-RED</i> | YJW726 | <i>pol2-M644G rad51::natMX4</i><br><i>rnh201-P45D-Y219A:hphMX6</i><br><i>top1::LEU2</i> | This study |
| <i>rad52Δ</i>                                           | MEA17  | <i>rad52::natMX4 agp1::URA3-OR1</i>                                                     | This study |
| <i>rad52Δ</i>                                           | YJW633 | <i>rad52::natMX4 agp1::URA3-OR2</i>                                                     | This study |
| <i>top1Δ</i><br><i>rad52Δ</i>                           | YJW664 | <i>top1::LEU2 rad52::natMX4</i><br><i>agp1::URA3-OR2</i>                                | This study |
| <i>rnh201Δ</i><br><i>rad52Δ</i>                         | MEA49  | <i>rnh201::hphMX4 rad52::natMX4</i><br><i>agp1::URA3-OR1</i>                            | This study |
| <i>rnh201Δ</i><br><i>rad52Δ</i>                         | YJW322 | <i>rnh201::hphMX4 rad52::natMX4</i><br><i>agp1::URA3-OR2</i>                            | This study |
| <i>rnh201Δ</i><br><i>rad52Δ top1Δ</i>                   | YJW667 | <i>rnh201::hphMX4 rad52::natMX4</i><br><i>agp1::URA3-OR2</i>                            | This study |
| <i>top1-5FLAG</i>                                       | YJW705 | <i>top1-5FLAG:natMX6</i>                                                                | This study |
| <i>top1-5FLAG</i><br><i>rnh201Δ</i>                     | YJW740 | <i>top1-5FLAG:natMX6 rnh201::hphMX4</i>                                                 | This study |

---

---

|                   |        |                                     |            |
|-------------------|--------|-------------------------------------|------------|
| <i>pol2-M644G</i> | YJW800 | <i>pol2-M644G top1-5FLAG:natMX6</i> | This study |
| <i>top1-5FLAG</i> |        | <i>rnh201::hphMX4</i>               |            |
| <i>rnh201Δ</i>    |        |                                     |            |

---

**Appendix Table S3** - Oligonucleotide sequences for the Top1 cleavage assay.

| Name                             | Sequence (5'-3')                                                                 |
|----------------------------------|----------------------------------------------------------------------------------|
| (AG) <sub>4</sub> -NTS           | AACGCTGAAG TGA <b><i>AGAGAGA</i></b> GCTTAAGCAA                                  |
| (AG) <sub>4</sub> -NTS-rU        | AACGCTGAAG <b><i>rUGAAGAGAGA</i></b> GCTTAAGCAA                                  |
| (AG) <sub>4</sub> -TS            | TTGCTTAAG <b><i>C TCTCTCTT</i></b> TCA CTTCAGCGTT                                |
| (AG) <sub>4</sub> -TS-5P         | P-TTGCTTAAG <b><i>C TCTCTCTT</i></b> TCA CTTCAGCGTT                              |
| (AT) <sub>2</sub> -NTS           | ACAAAGGTTT TGCCAC <b><i>ATAT</i></b> CTTCAACGCT                                  |
| (AT) <sub>2</sub> -TS            | AGCGTTGAAG <b><i>ATAT</i></b> GTGGCA AAACCTTTGT                                  |
| (AT) <sub>2</sub> -TS-5-6R       | AGCG <b><i>rUr</i></b> UGAAG <b><i>ATAT</i></b> GTGGCA AAACCTTTGT                |
| (AT) <sub>2</sub> -TS-7-8R       | AGCGTT <b><i>rGr</i></b> AAG <b><i>ATAT</i></b> GTGGCA AAACCTTTGT                |
| (AT) <sub>2</sub> -TS-9-10R      | AGCGTTGA <b><i>rAr</i></b> G <b><i>ATAT</i></b> GTGGCA AAACCTTTGT                |
| (AT) <sub>2</sub> -TS-11-12R     | AGCGTTGAAG <b><i>rArU</i></b> ATGTGGCA AAACCTTTGT                                |
| (AT) <sub>2</sub> -TS-13-14R     | AGCGTTGAAG <b><i>ATrAr</i></b> UGTGGCA AAACCTTTGT                                |
| (AT) <sub>2</sub> -TS-15-16R     | AGCGTTGAAG <b><i>ATATrGr</i></b> UGGCA AAACCTTTGT                                |
| (AT) <sub>2</sub> -TS-17-18R     | AGCGTTGAAG <b><i>ATATGT</i></b> <b><i>rGr</i></b> GCA AAACCTTTGT                 |
| (AT) <sub>2</sub> -TS-19-20R     | AGCGTTGAAG <b><i>ATATGTGG</i></b> <b><i>rCr</i></b> A AAACCTTTGT                 |
| (AT) <sub>2</sub> -TS-One-ribo   | AGCGTTGAAG <b><i>ArU</i></b> ATGTGGCA AAACCTTTGT                                 |
| (AT) <sub>2</sub> -TS-Two-ribo   | AGCGTTGAAG <b><i>rArU</i></b> ATGTGGCA AAACCTTTGT                                |
| (AT) <sub>2</sub> -TS-Three-ribo | AGCGTTGA <b><i>rG</i></b> <b><i>rArU</i></b> ATGTGGCA AAACCTTTGT                 |
| (AT) <sub>2</sub> -TS-All-ribo   | <b><i>rArGrCrGrUrUrGrArArG rArUrArUrGrUrGrGrCrA<br/>rArArArCrCrUrUrUrGrU</i></b> |

\* Bold, italic fonts denote the positions (AG)<sub>4</sub> or (AT)<sub>2</sub> sequences. Ribonucleotides are in red.  
 TS: transcribed strand, NTS: non-transcribed strand.

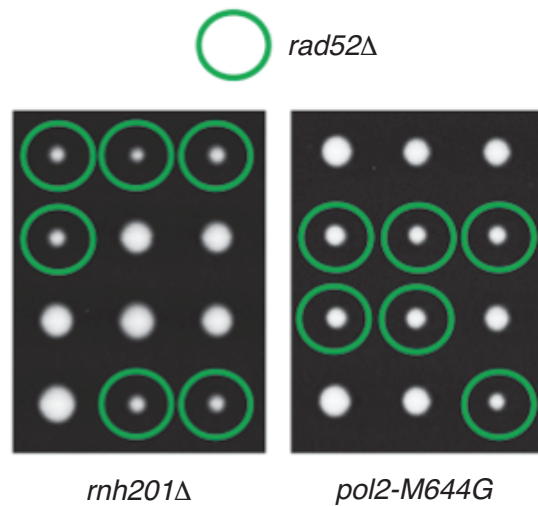

**Appendix Figure S1 - *RAD52* is not essential for maintaining viability in the *rnh201Δ* or *pol2-M644G* control strains.** *RAD52/rad52Δ* diploid dissections demonstrate that *RAD52* is dispensable for viability in an *RNase H2*-deficient strain containing wild type replicative polymerases (*rnh201Δ*) or in a strain containing *pol2-M644G* mutator allele yet is proficient in *RNase H2* activity (*RNH201-WT*). Each column is a tetrad dissection. Plates were photographed after growth period of 3 days at 30 °C on rich medium.



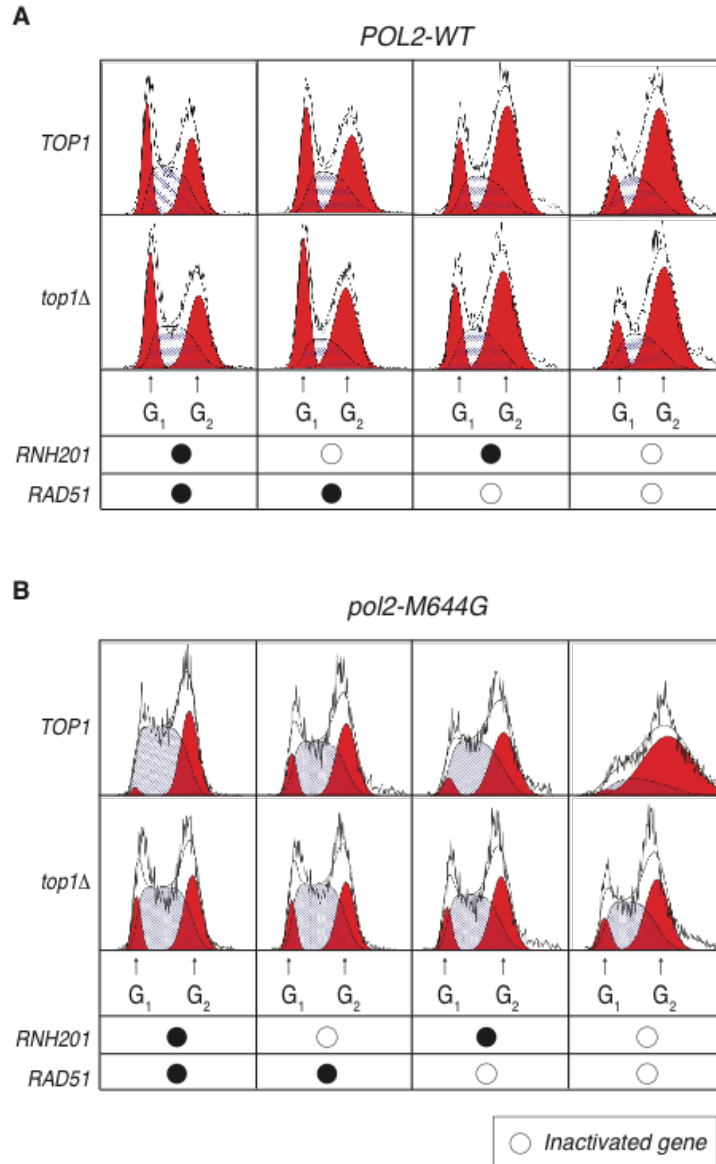

**Appendix Figure S2 - Histograms displaying the disruption in cell cycle distribution caused by Top1-dependent genome instability in the *RNase H2* and/or *Rad51*-deficient yeast strains.**

A *POL2-WT*.

B *pol2-M644G* (quantification is shown as bar graph in Fig 3B).

Open circles indicate inactivated genes for each strain. In each histogram, the horizontal axis represents the fluorescence parameter and the vertical axis represents the number of cells. The raw data (plotted lines) were fitted to cell cycle phase populations (smoothed lines) using ModFit software analysis. The red shaded areas represent cells in G<sub>1</sub> or G<sub>2</sub>/M phases, the striped area represent cells in S phase.

**A**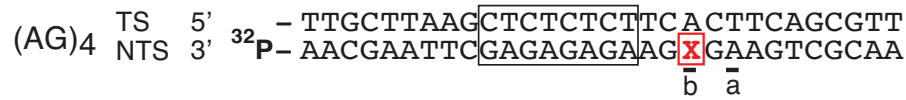**B**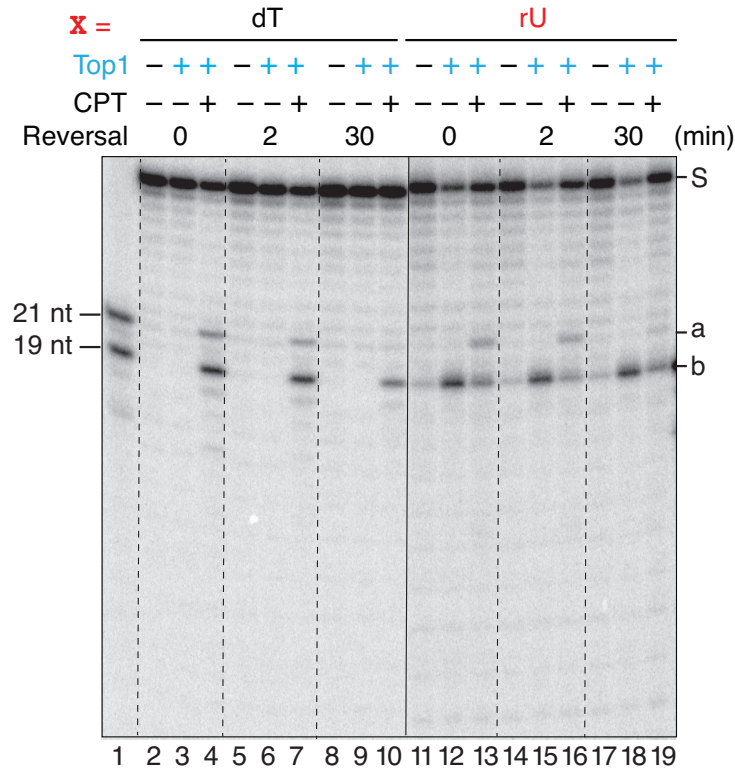

**Appendix Figure S3 - Ribonuclease activity of Top1 induces irreversible nicks at ribonucleotide sites.**

**A** DNA constructs containing the sequence from the *CAN1* (AG)<sub>4</sub> site (marked by a box) with the non-transcribed strand (NTS) radio-labeled at the 3'-end. Position X in the (NTS) contained either a deoxythymidine (dT) or a ribouridine (rU).

**B** Top1 cleavage and reversal assay with the DNA construct shown in panel A. Top1 cleavage reaction samples were allowed to reach equilibrium before addition of 0.5 M NaCl (final concentration) to reverse Top1 cleavage complexes. A small volume was withdrawn from the sample at the indicated time points and analyzed on a sequencing gel. Top1-induced products are labeled a-b. DNA markers of predicted sizes are loaded in lane 1. In the presence of a deoxyribonucleotide at the position X in the NTS, Top1 induced both cleavage sites only in the presence of camptothecin (CPT) (lane 4). Nevertheless, both Top1 cleavage products diminished with increasing time of reversal reaction (lanes 4, 7 and 10). In the case of a ribonucleotide at the position X, Top1 cleavage product at site a was CPT-dependent and reversible (lanes 13, 16, and 19). However, Top1 cleavage product at site b, which corresponded to the product of Top1 ribonuclease activity, was CPT-independent and irreversible (lanes 12, 15 and 18).

**A**

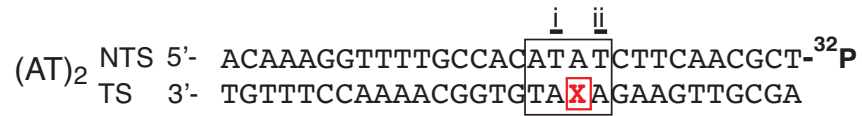

**B**

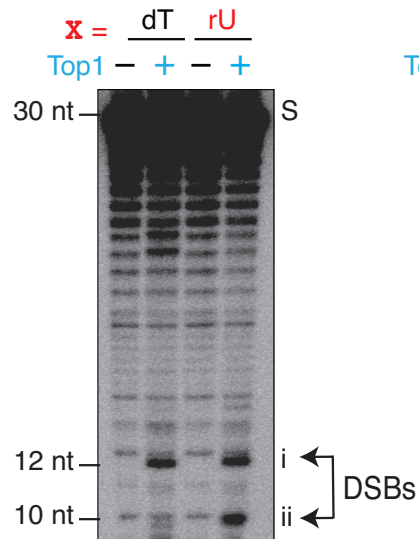

**C**

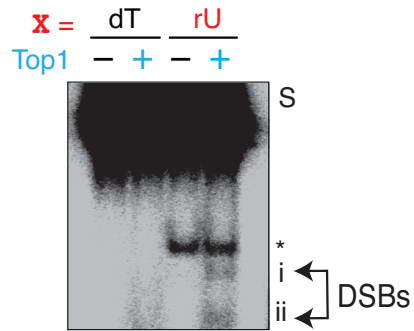

**Appendix Figure S4 - Top1 induces DSBs in close proximity to ribonucleotide sites.**

**A** DNA constructs containing the sequence from the *CAN1* (AT)<sub>2</sub> site (marked by a box) with the non-transcribed strand (NTS) radio-labeled at the 3'-end. Position X in the transcribed strand (TS) contained either a deoxythymidine (dT) or a ribouridine (rU).

**B** Representative gel image of Top1 cleavage assay with the construct shown in panel A, resolved on a denaturing sequencing gel. Top1-induced products are labeled i-ii, with the corresponding Top1 cleavage site labeled below the sequence in panel A.

**C** Top1 cleavage assay with the same construct resolved on a native gel. A non-specific product that is likely due to a partial melting of the nicked substrate is denoted by the asterisk.

## Appendix References

- Clark AB, Lujan SA, Kissling GE, Kunkel TA (2011) Mismatch repair-independent tandem repeat sequence instability resulting from ribonucleotide incorporation by DNA polymerase epsilon. *DNA Repair (Amst)* 10: 476-82
- Endo K, Tago Y, Daigaku Y, Yamamoto K (2007) Error-free RAD52 pathway and error-prone REV3 pathway determines spontaneous mutagenesis in *Saccharomyces cerevisiae*. *Genes & genetic systems* 82: 35-42
- Huang ME, Rio AG, Galibert MD, Galibert F (2002) Pol32, a subunit of *Saccharomyces cerevisiae* DNA polymerase delta, suppresses genomic deletions and is involved in the mutagenic bypass pathway. *Genetics* 160: 1409-22
- Kim N, Huang S-yN, Williams JS, Li YC, Clark AB, Cho J-E, Kunkel TA, Pommier Y, Jinks-Robertson S (2011) Mutagenic processing of ribonucleotides in DNA by yeast topoisomerase I. *Science* 332: 1561-4
- Kunz BA, Peters MG, Kohalmi SE, Armstrong JD, Glatkne M, Badiani K (1989) Disruption of the RAD52 gene alters the spectrum of spontaneous SUP4-o mutations in *Saccharomyces cerevisiae*. *Genetics* 122: 535-42
- Kunz BA, Ramachandran K, Vonarx EJ (1998) DNA sequence analysis of spontaneous mutagenesis in *Saccharomyces cerevisiae*. *Genetics* 148: 1491-505
- Nick McElhinny SA, Kumar D, Clark AB, Watt DL, Watts BE, Lundström E-B, Johansson E, Chabes A, Kunkel TA (2010) Genome instability due to ribonucleotide incorporation into DNA. *Nat Chem Biol* 6: 774-81
- Roche H, Gietz RD, Kunz BA (1995) Specificities of the *Saccharomyces cerevisiae* rad6, rad18, and rad52 mutators exhibit different degrees of dependence on the REV3 gene product, a putative nonessential DNA polymerase. *Genetics* 140: 443-56
- Williams JS, Smith DJ, Marjavaara L, Lujan SA, Chabes A, Kunkel TA (2013) Topoisomerase 1-mediated removal of ribonucleotides from nascent leading-strand DNA. *Mol Cell* 49: 1010-5
